# Supplementary material for: Quality of Life of People Living with HIV/AIDS: A Cross-Sectional Study in Zhejiang Province, China
Source: PLoS One. 2015 Aug 26;10(8):e0135705. doi: 10.1371/journal.pone.0135705 (PMC4550400; doi:10.1371/journal.pone.0135705)
Supplement: S2 Table — (XLSX) [file pone.0135705.s002.xlsx]

## Sheet: S2 table
S2 table. Comparison of mean scores of quality of life according to socio-demographic, clinical and disease-related characteristics(male homo)
Variables	Physiological domain	Psychological domain	Social relation domain	Environmental domain	Total score of QOL
Gender
Male homo (n=117)	15.08±2.44	14.48±2.35	13.47±2.53	13.81±2.01	15.93±2.28
Age(yrs)
<30(n=37)	16.11±1.69	15.26±1.86	14.27±1.88	14.23±1.65	16.71±1.88
30～(n=38)	14.54±2.72	14.00±2.87	12.77±2.78	13.24±2.28	15.74±2.52
40～(n=28)	14.76±2.73	14.12±1.95	13.19±2.96	13.70±2.07	15.40±2.35
50～(n=10)	14.86±2.00	14.53±2.37	14.40±1.97	14.60±1.81	15.44±2.10
≥60(n=4)	13.57±2.05	14.33±2.58	12.33±0.67	14.25±1.19	15.60±2.40
P value	0.029**	0.172	0.056	0.16	0.155
ethnic
Han(n=116)	15.07±2.44	14.47±2.35	13.45±2.53	13.81±2.01	15.91±2.28
Minority(n=1)	16.57	16.67	16	14.5	18.4
P value
Educational status
None(n=1,out of ANOVA)	16	16.67	13.33	14	13.6
Primary(n=13)	15.82±2.00	15.33±1.72	13.64±2.88	14.08±1.68	16.70±2.05
Secondary(n=40)	14.74±2.29	14.13±2.02	13.47±2.13	13.40±1.95	15.80±2.04
Tertiary and above(n=63)	15.13±2.71	14.50±2.62	13.44±2.74	14.02±2.10	15.90±2.46
P value	0.373	0.276	0.967	0.283	0.448
Marital status
Single(n=62)	15.68±2.28	14.81±2.53	13.55±2.56	13.94±1.99	16.26±2.32
Married(n=35)	14.45±2.66	14.29±2.07	13.41±2.69	13.77±2.13	15.73±2.41
Divorced or widowed(n=20)	14.34±2.08	13.83±2.12	13.33±2.29	13.48±1.88	15.29±1.80
P value	0.018*	0.229	0.935	0.659	0.213
Occupation
Farmer(n=30)	15.14±2.00	14.80±1.86	13.73±2.60	13.88±1.94	16.26±2.02
Not farmer(n=87)	15.06±2.58	14.38±2.49	13.38±2.52	13.79±2.04	15.82±2.36
P value	0.874	0.395	0.512	0.822	0.365
Area
inner province(n=89)	15.24±2.21	14.57±2.10	13.65±2.37	13.85±1.99	15.97±2.25
other province(n=89)	14.57±3.03	14.21±3.04	12.90±2.97	13.68±2.07	15.82±2.43
P value	0.205	0.487	0.177	0.688	0.757
Reported STD symptom(n=116)
Yes(n=32)	15.32±2.43	14.31±2.78	13.00±2.44	13.73±1.97	15.66±2.92
No(n=69)	15.13±2.26	14.64±2.47	13.74±2.37	13.92±1.91	16.16±1.92
NA(n=15)	14.25±3.20	14.04±2.01	13.07±3.35	13.33±2.51	15.41±2.23
P value	0.356	0.615	0.327	0.583	0.38
CD4 cell count(cells/mm3 ) （n=117)
≤200(n=14)	14.90±2.40	14.29±2.17	13.14±2.86	13.43±2.08	16.51±1.64
201～349(n=36)	14.57±2.72	14.17±2.24	13.04±2.45	13.53±2.07	15.35±2.83
350～499(n=28)	15.22±2.26	14.40±2.08	13.62±2.63	13.75±1.71	16.16±2.02
≥500(n=39)	15.52±2.29	14.91±2.68	13.88±2.44	14.26±2.11	16.11±2.04
P value	0.396	0.567	0.498	0.369	0.287
On HAART
Yes(n=87)	14.72±2.65	14.25±2.48	13.23±2.60	13.70±2.12	15.73±2.12
No (n=30)	16.13±1.20	15.16±1.78	14.18±2.23	14.13±1.61	16.54±2.64
P value	0.006**	0.069	0.076	0.311	0.092
WHO clinical stage(n=87 on HAART)
Ⅰstage(n=60)	14.47±2.75	14.13±2.59	13.44±2.62	13.78±2.08	15.38±2.23
Ⅱstage(n=19)	15.07±2.18	14.18±2.35	12.56±2.24	13.24±2.16	16.16±1.57
Ⅲ and Ⅳ stage(n=8)	15.79±2.83	15.33±1.85	13.17±3.22	14.25±2.43	17.26±1.69
P value	0.341	0.437	0.438	0.473	0.036*
Adherence of HAART（n=87）
Leakage of drug(n=80)	14.53±2.65	14.09±2.47	13.03±2.59	13.58±2.11	15.64±2.04
No leakage of drug(n=7)	16.90±1.43	16.10±1.90	15.43±1.51	15.07±1.92	16.71±2.84
P value	0.022*	0.040*	0.018*	0.075	0.202
Treatment duration(n=87 on HAART)
≤24 months(n=46)	14.47±2.50	14.06±2.06	13.04±2.71	13.53±1.99	15.48±1.98
25~48 months(n=28)	14.84±2.94	14.48±3.07	13.29±2.45	13.79±2.42	16.08±2.21
≥49 months(n=13)	15.34±2.58	14.46±2.59	13.74±2.63	14.12±2.00	15.83±2.44
P value	0.561	0.744	0.689	0.665	0.496
Note: *P<0.05 and **P<0.01
